# Supplementary material for: Design of a C-b-(A-co-B)-b-C telechelic polyampholyte pH-responsive gelator
Source: Royal Society of Chemistry journal article supplement (doi:10.1039/c5py02066b), 2016-01-01
Supplement: c5py02066b1.pdf [file c5py02066b1.pdf]

## SUPPORTING INFORMATION

### Design of a C-*b*-(A-co-B)-*b*-C telechelic polyampholyte pH-responsive gelator

George Gotzamanis, Konstantinia Papadimitriou and Constantinos Tsitsilianis,\*

Department of Chemical Engineering, University of Patras, 26504, Patras, Greece

#### <sup>1</sup>H NMR spectra

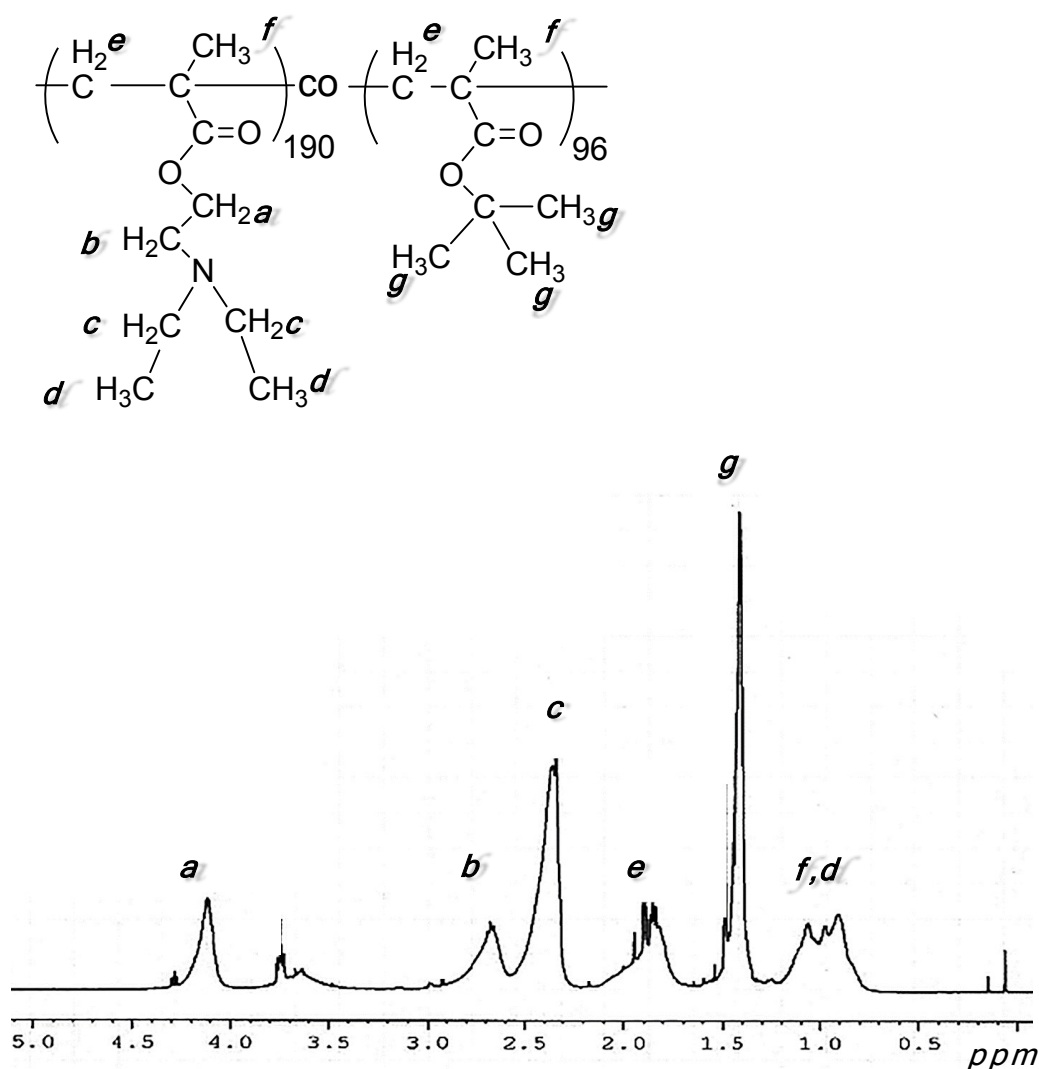

**Figure 1.** <sup>1</sup>H NMR spectrum of the statistical copolymer P(DEA-co-t-BMA) in CDCl<sub>3</sub>.

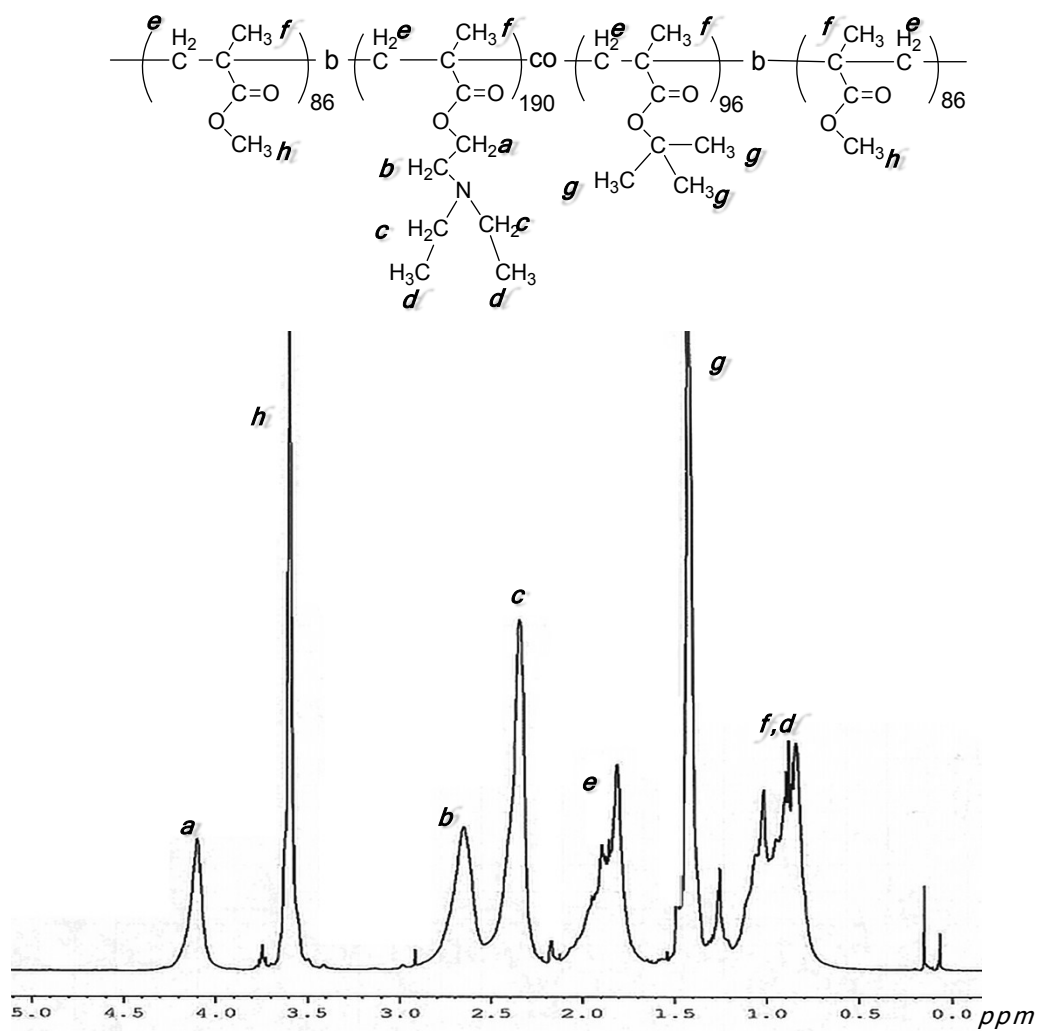

**Figure 2.**  $^1\text{H}$  NMR spectrum of the block copolymer PMMA-b-P(DEA-co-tBMA)-b-PMMA in  $\text{CDCl}_3$ .

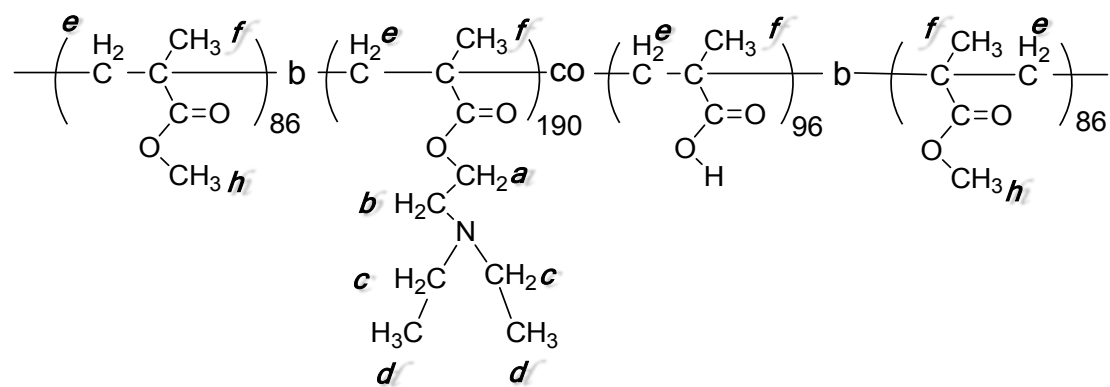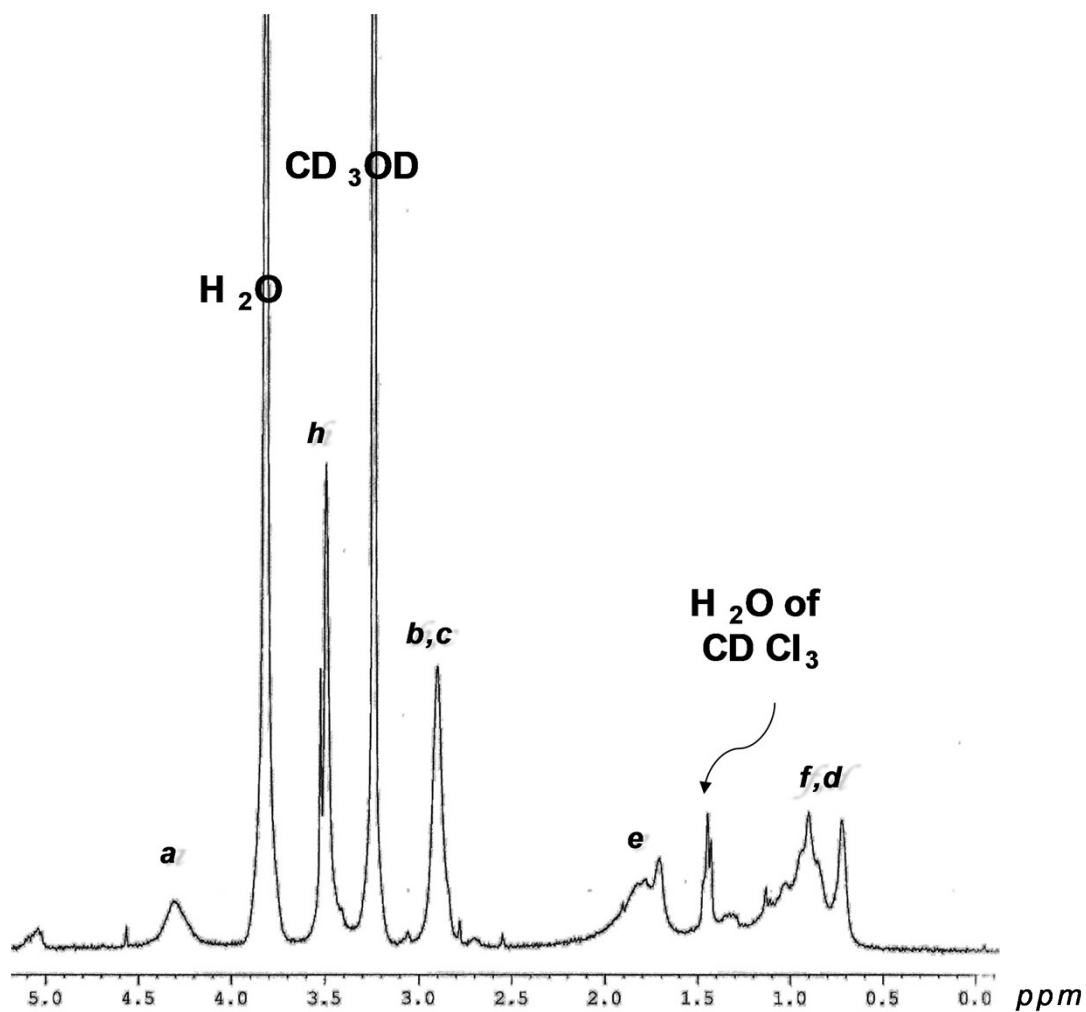

**Figure 3.**  $^1\text{H}$  NMR spectrum of the hydrolyzed block copolymer PMMA-b-P(DEA-co-MAA)-b-PMMA in MeOD/ $\text{CDCl}_3$  (3/1).
